# Supplementary material
Source: ML conference proceedings conference paper supplement (https://openaccess.thecvf.com/content/ICCV2021/html/Wei_NerfingMVS_Guided_Optimization_ICCV_2021_paper.html)
Supplement: Supplementary file 1 [file Wei_NerfingMVS_Guided_Optimization_ICCV_2021_supplemental.zip]

Archive with 2 entries (2 files):
- 04076-demo.mp4
- 04076-supp.pdf
